# Supplementary material for: Perturbed Microbial Ecology in Myasthenia Gravis: Evidence from the Gut Microbiome and Fecal Metabolome
Source: PubMed Central journal article supplement (PMC6755540; doi:10.1002/advs.201901441), 2019-07-31
Supplement: ADVS-6-1901441-s001.pdf [file ADVS-6-1901441-s001.pdf]

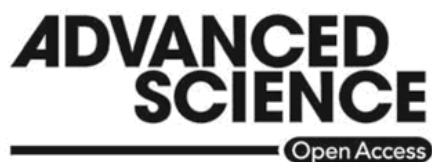

## Supporting Information

for *Adv. Sci.*, DOI: 10.1002/advs.201901441

Perturbed Microbial Ecology in Myasthenia Gravis: Evidence from the Gut Microbiome and Fecal Metabolome

*Peng Zheng, Yifan Li, Jing Wu, Hanping Zhang, Yu Huang, Xunmin Tan, Junxi Pan, Jiajia Duan, Weiwei Liang, Bangmin Yin, Fengli Deng, Seth W. Perry, Ma-Li Wong, Julio Licinio, Hong Wei,\* Gang Yu,\* and Peng Xie\**

# Supporting Information

Figure. S1

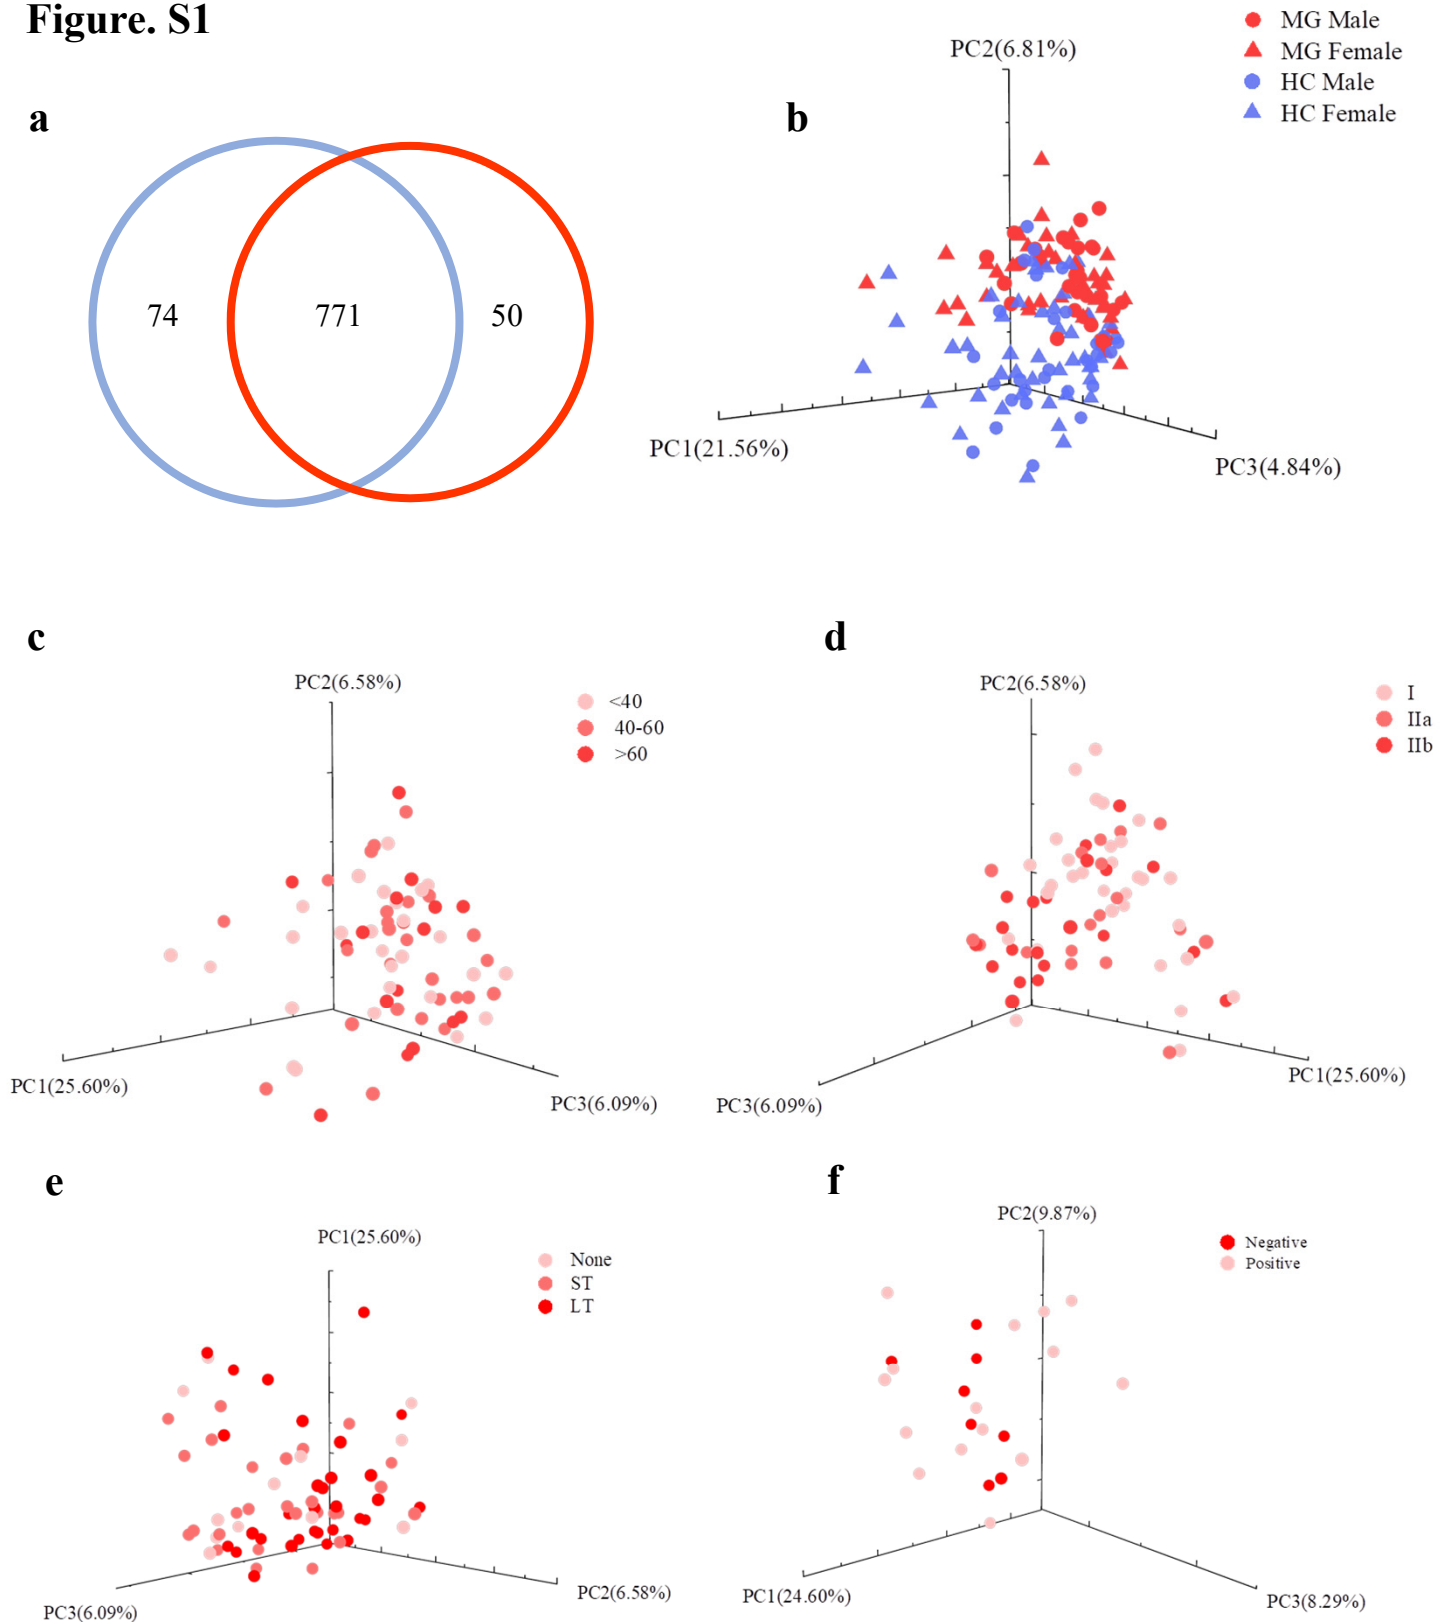

**Figure. S1.** (a) A Venn diagram showed that 771 of 895 OTUs were detected in the two groups, while 50 and 74 OTUs were unique to MG subjects (red circle, n=70) and HCs (blue circle, n=74), respectively. (b) The global microbial phenotypes were not clustered based on sex (n=44, HC Female; n=30, HC Male; n=39, MG Female; n=31, MG Male). (c-f) The global microbial phenotypes of MG groups were not clustered based on age (n=27, <40; n=26, 40-60; n=17, >60. MG), clinical classification, medication (n=30, LT; n=27, ST; n=12, None; LT: long term immunosuppressive treatment; ST: short term treatment; None: no treatment), and AChR antibody (n=15, Positive; n=8, Negative).

**Figure. S2**

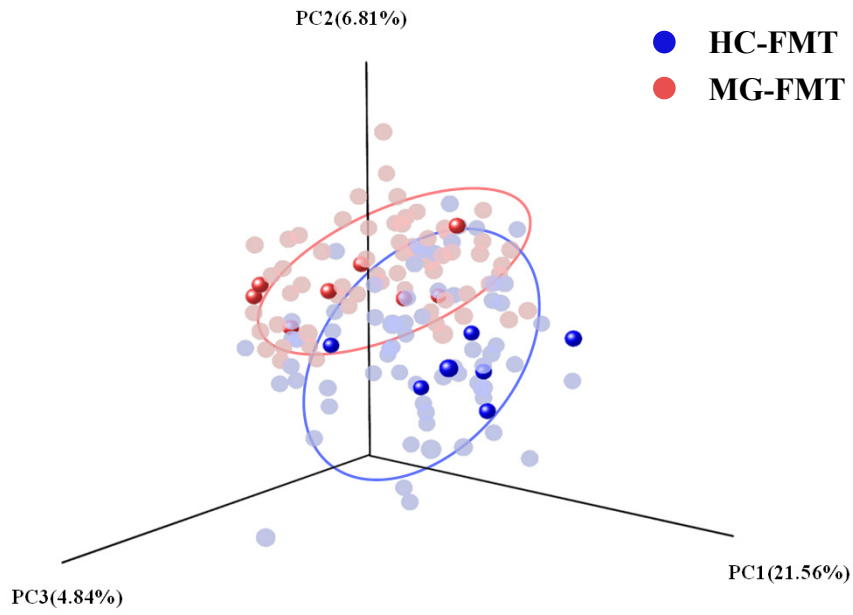

**Figure. S2** The samples used for fecal microbiota transplantation experiments (n=7-8 for every group) were mixed with the remaining samples (n=74, HC; n=70, MG group).

## Figure. S3

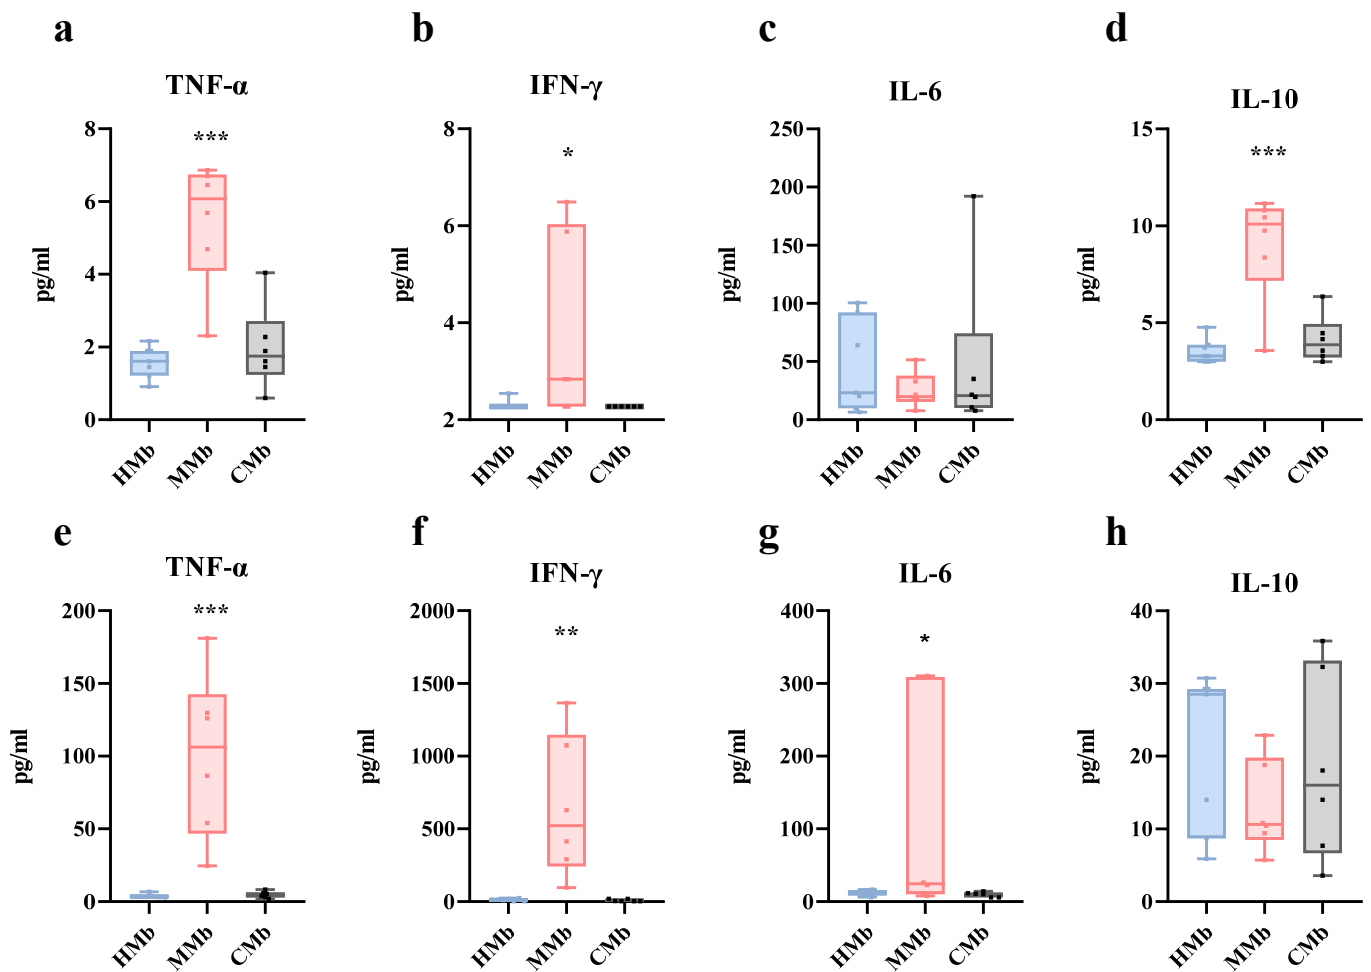

**Figure. S3.** The cytokine levels in serum and intestinal tissue among the three groups. (a-d) The serum levels of TNF- $\alpha$ , IFN- $\gamma$ , and IL-10 were significantly increased in MMb group relative to HMb group. These increased cytokines can be reversed in CMb group. (e-h) Compared to HMb group, the levels of TNF- $\alpha$ , IFN- $\gamma$ , and IL-6 were significantly un-regulated in MMb group; and these changes were reversed to normal level in CMb group. (male mice, HMb, n=7 ; MMb,n=6; CMb, n=6). \* P<0.05, \*\*P<0.01, \*\*\*P<0.001 by one way ANOVA .
